# Supplementary material for: Transition Metal Complexes of Schiff Base Ligands Prepared from Reaction of Aminobenzothiazole with Benzaldehydes
Source: MDPI journal article supplement (doi:10.3390/inorganics10040043), 2022-03-30
Supplement: s1 [file s1]

## Supplementary Materials

# Transition Metal Complexes of Schiff Base Ligands Prepared from Reaction of Aminobenzothiazole with Benzaldehydes

Mahmoud Sunjuk <sup>1,\*</sup>, Lana Al-Najjar <sup>1</sup>, Majed Shtaiwi <sup>1</sup>, Bassam El-Eswed <sup>2</sup>, Mousa Al-Noaimi <sup>1,3</sup>, Luay Al-Essa <sup>4</sup> and Kamal Sweidan <sup>5</sup>

<sup>1</sup> Department of Chemistry, Faculty of Science, The Hashemite University, Zarqa 13133, Jordan; lanam\_s@hu.edu.jo (L.A.-N.); MajedH@hu.edu.jo (M.S.); manoaimi@hu.edu.j (M.A.-N.)

<sup>2</sup> Department of Basic Sciences, Zarqa College, Al-Balqa Applied University, Al Salt 19117, Jordan; bassameswed@bau.edu.jo

<sup>3</sup> Chemistry Department, Faculty of Science, Kuwait University, Safat 13060, Kuwait

<sup>4</sup> Department of Pharmacy, Faculty of Pharmacy, Al-Zaytoonah University of Jordan, Amman 11733, Jordan; luayyousif@yahoo.com

<sup>5</sup> Department of Chemistry, The University of Jordan, Amman 11942, Jordan; k.Sweidan@ju.edu.jo

\* Correspondence: Mahmoud.Sunjuk@hu.edu.jo



**Table S1. 2D-NMR HMQC, A: NB, and B: HB Ligands**

| <sup>13</sup> C-NB | <sup>1</sup> H |
|--------------------|----------------|
| ( δ/ppm)           | ( δ/ppm)       |
| 56.24              | 3.86           |
| 105.59             | 7.70           |
| 116.68             | 7.15           |
| 124.36             | 7.90           |
| 125.36             | 8.19           |
| 130.32             | 8.28           |
| 134.07             | 7.90           |
| 163.11             | 9.44           |

**(A)**

| <sup>13</sup> C-HB | <sup>1</sup> H |
|--------------------|----------------|
| ( δ/ppm)           | ( δ/ppm)       |
| 56.23              | 3.82           |
| 102.91             | 6.37           |
| 105.59             | 7.61           |
| 109.59             | 6.46           |
| 116.13             | 7.07           |
| 123.27             | 7.77           |
| 134.84             | 7.70           |
| 165.27             | 9.17           |

**(B)**



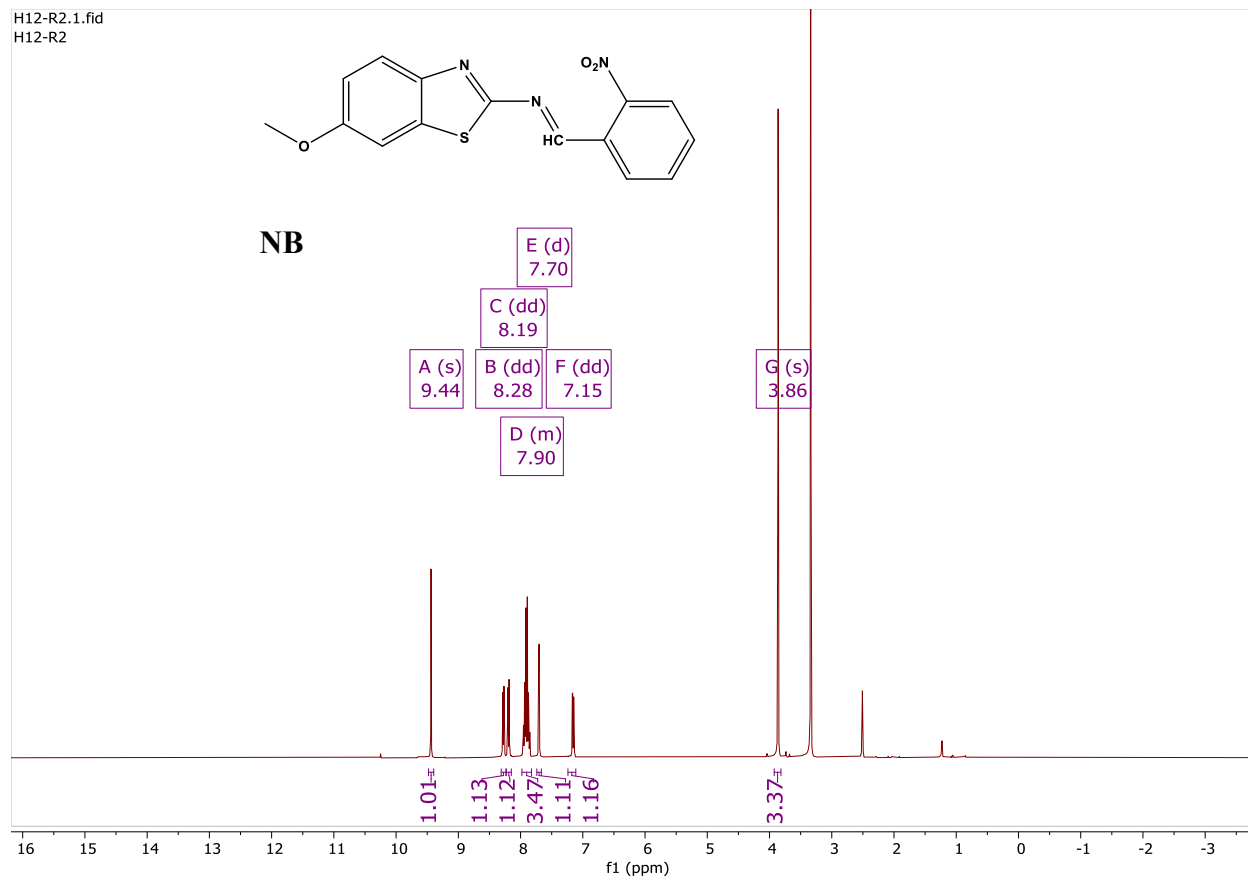

Figure S1.  $^1\text{H}$ -NMR spectrum of NB ligand.



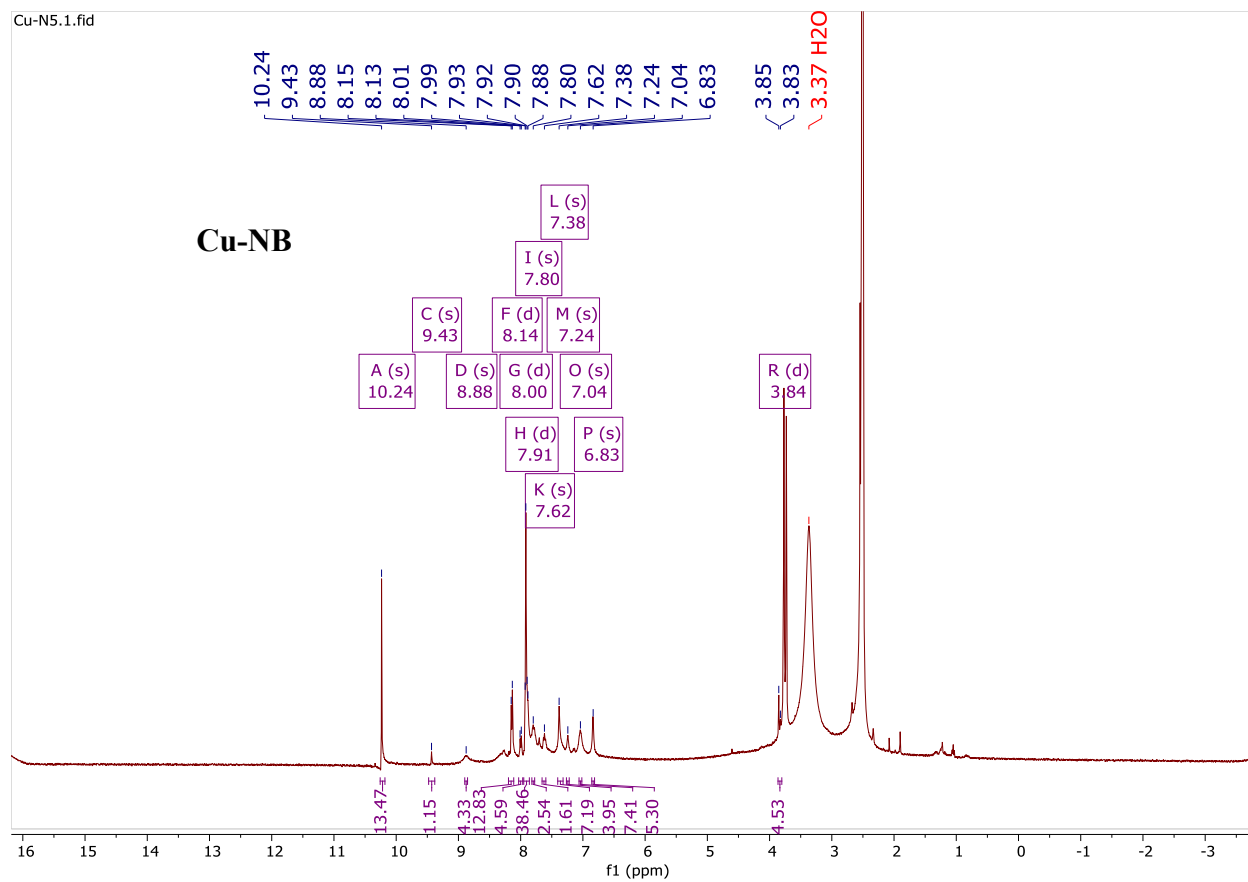

Figure S2. <sup>1</sup>H-NMR spectrum of Cu-NB complex.



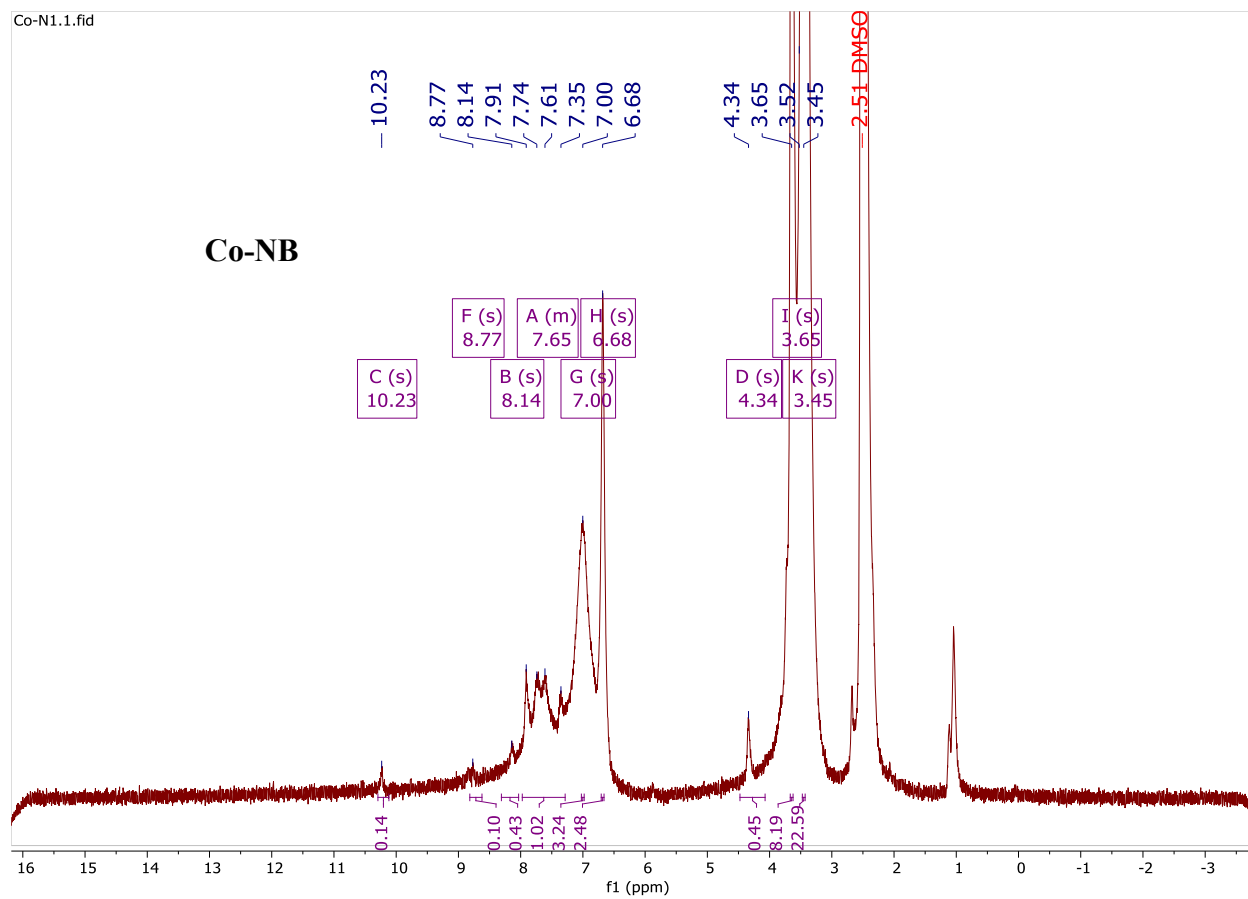

Figure S3.  $^1\text{H}$ -NMR spectrum of Co-NB complex.



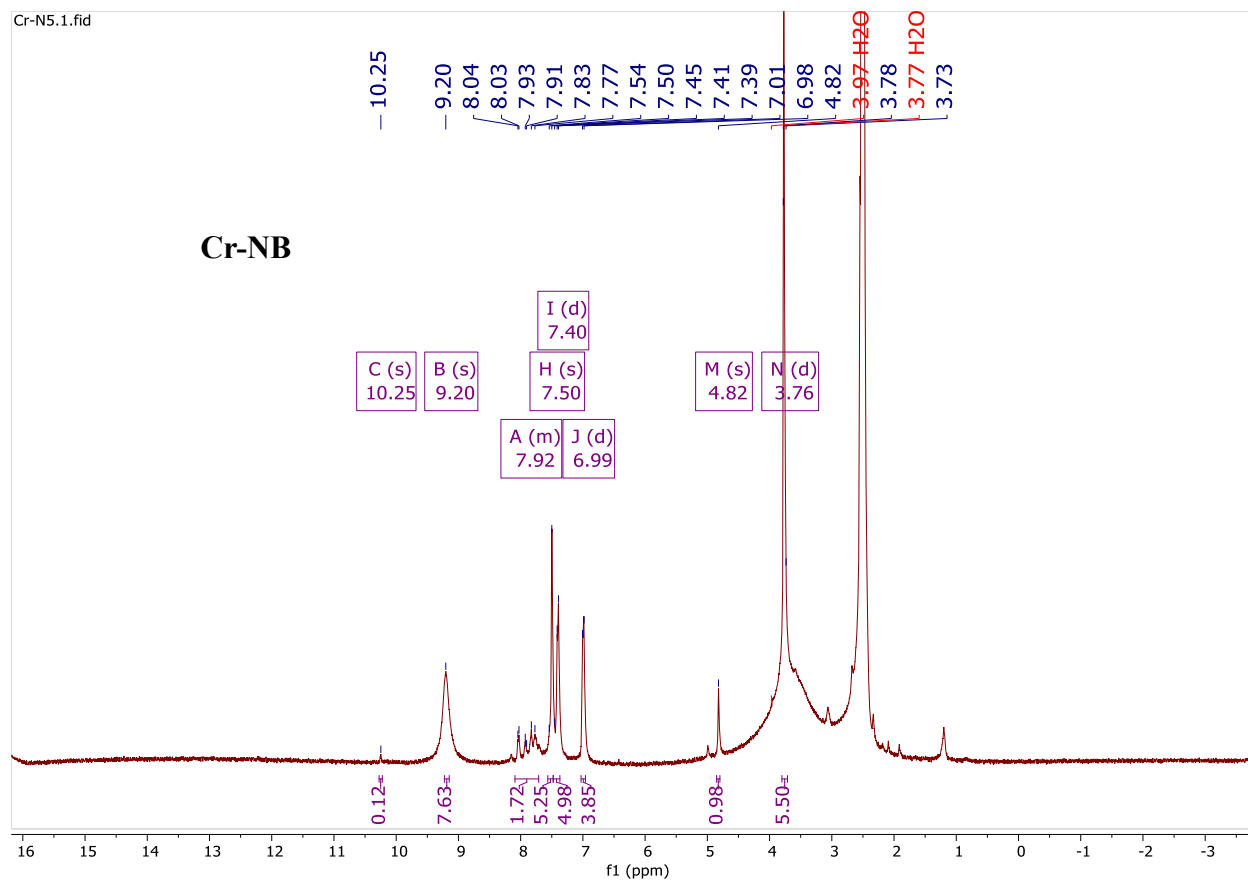

Figure S4.  $^1\text{H}$ -NMR spectrum of Cr-NB complex.



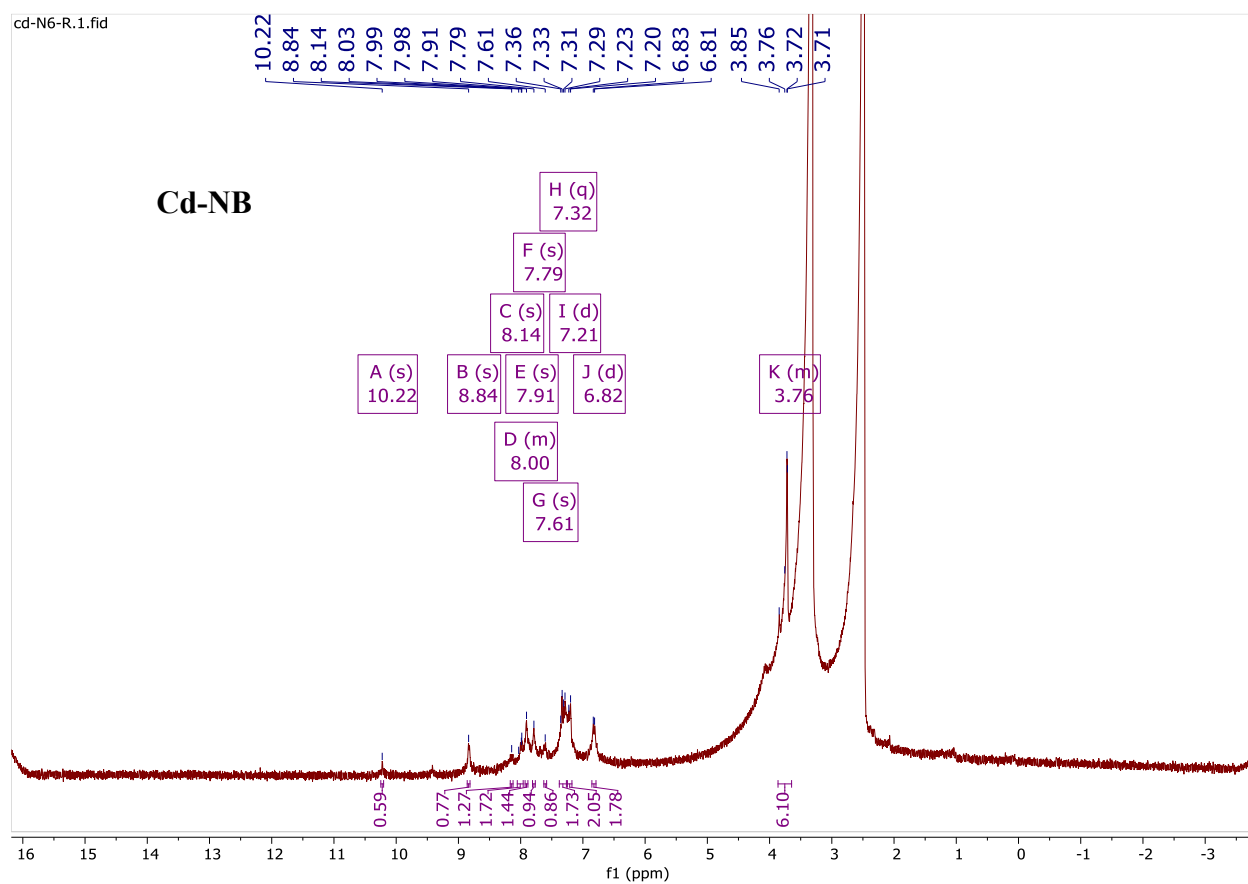

Figure S5.  $^1\text{H}$ -NMR spectrum of Cd-NB complex.



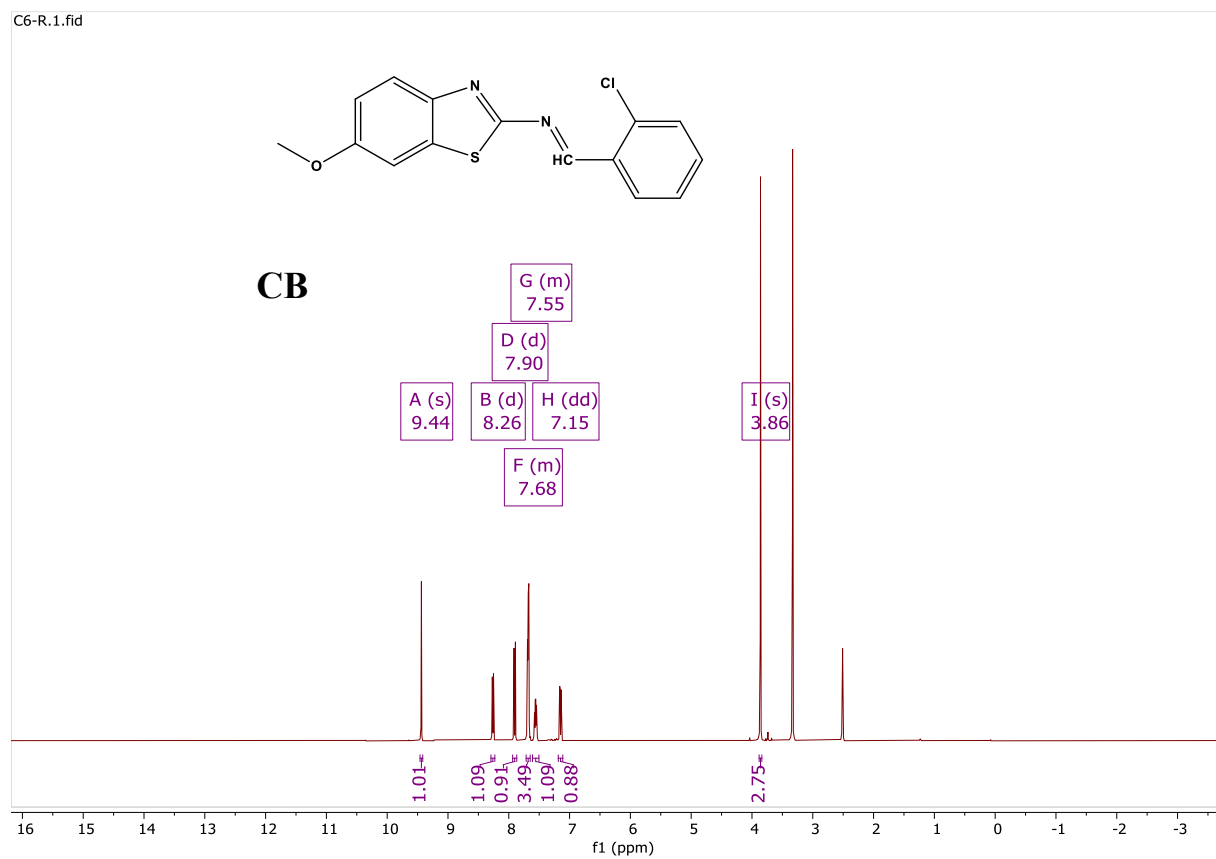

Figure S6.  $^1\text{H}$ -NMR spectrum of CB ligand.



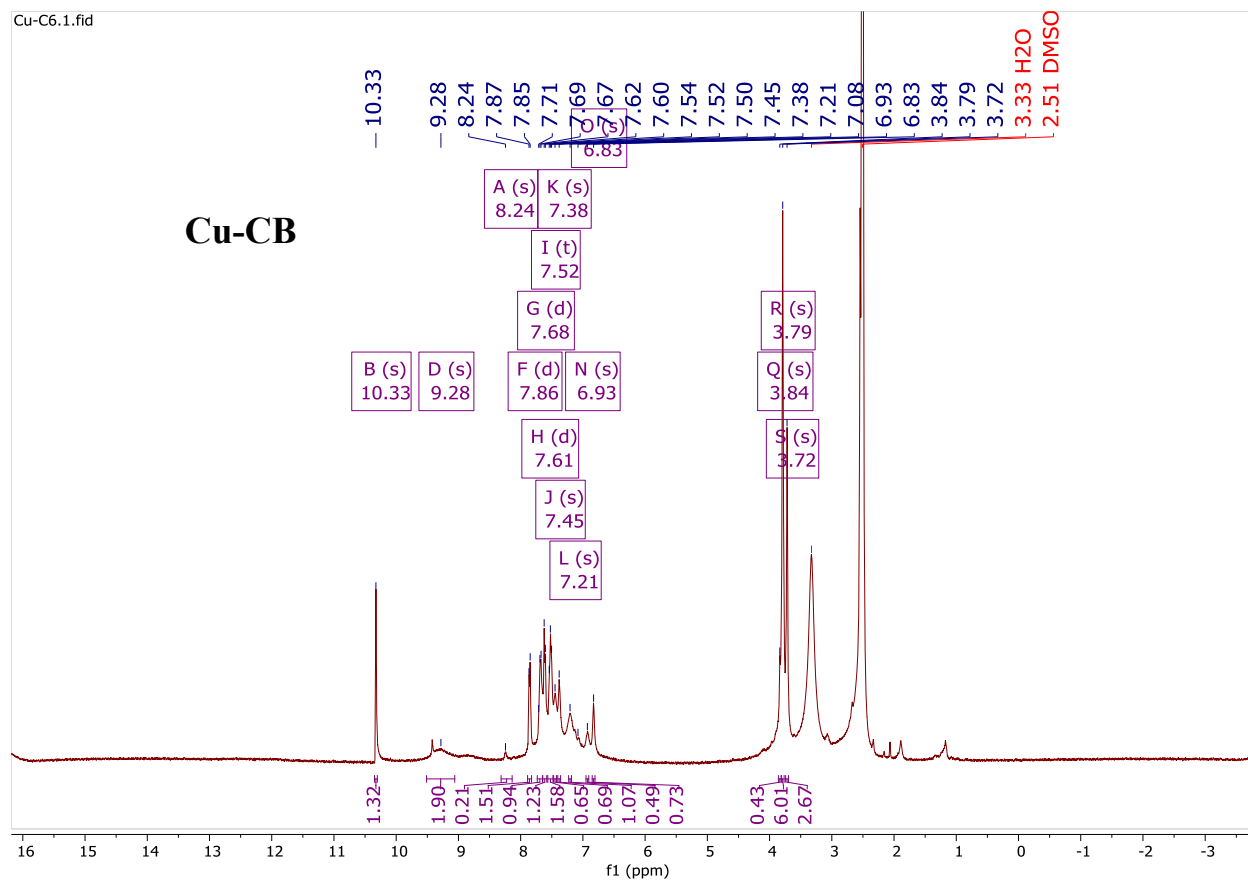

Figure S7. <sup>1</sup>H-NMR spectrum of Cu-CB complex.



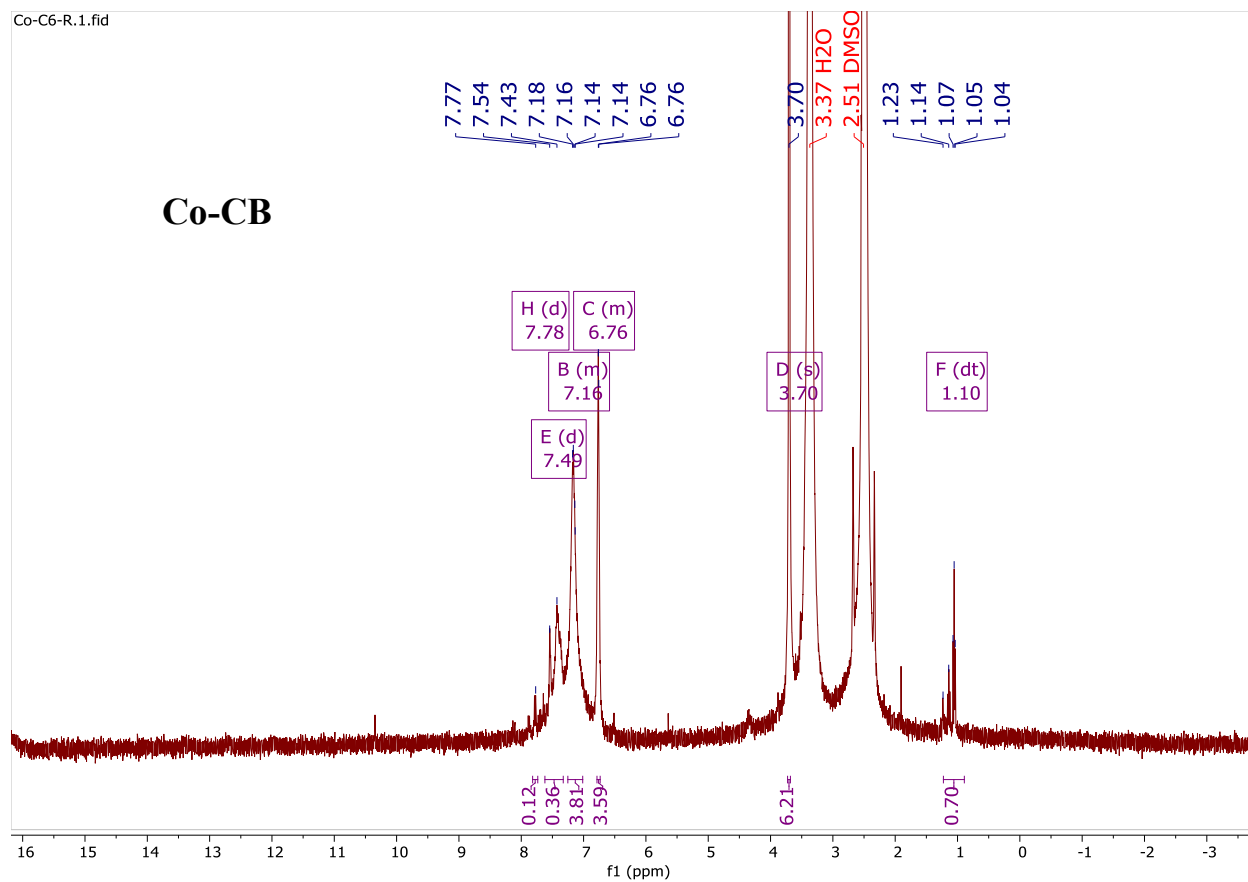

Figure S8. <sup>1</sup>H-NMR spectrum of Co-CB complex.



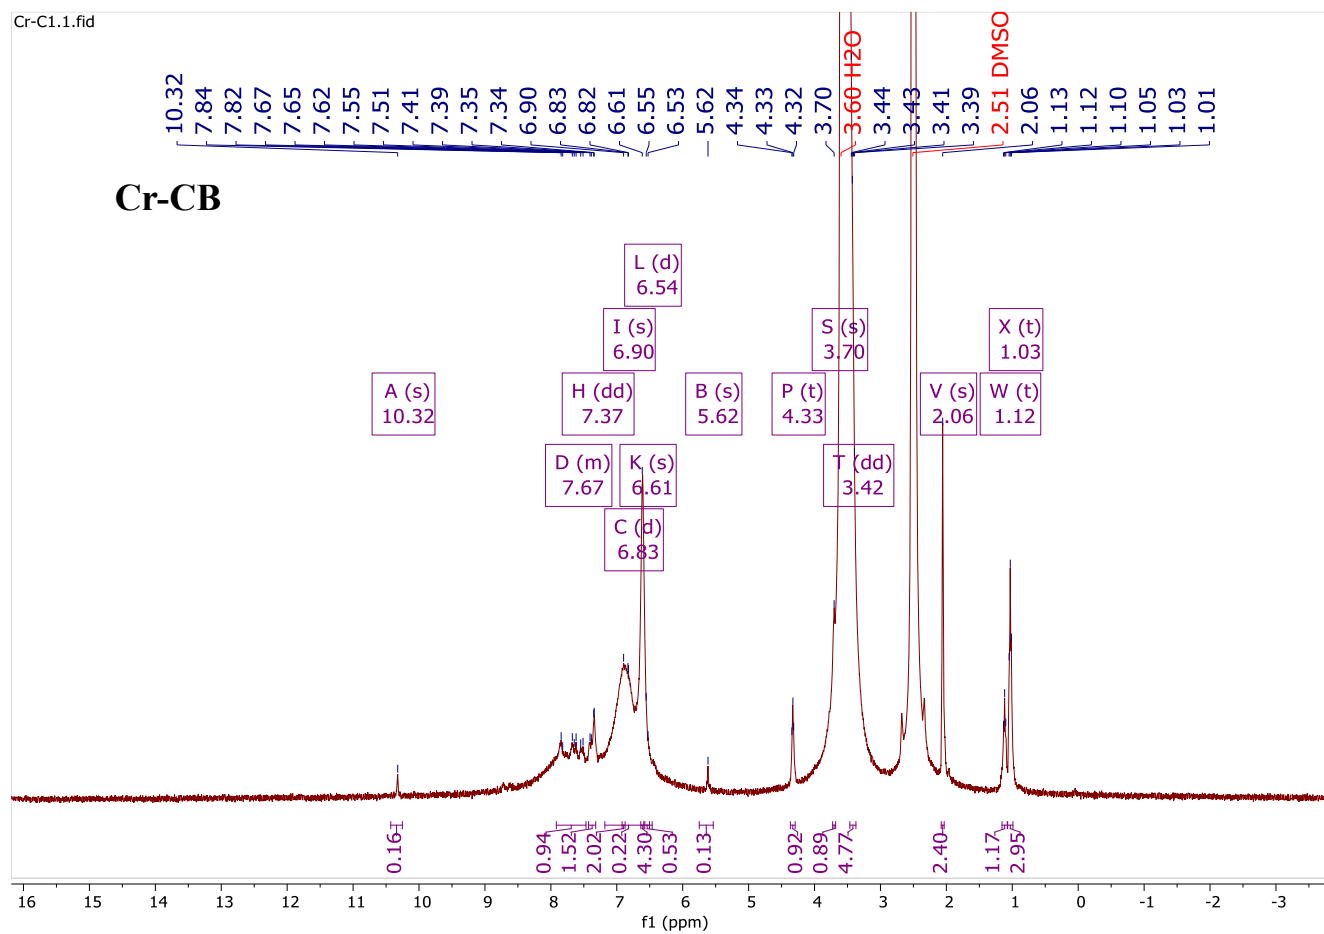

Figure S9.  $^1\text{H}$ -NMR spectrum of Cr-CB complex.



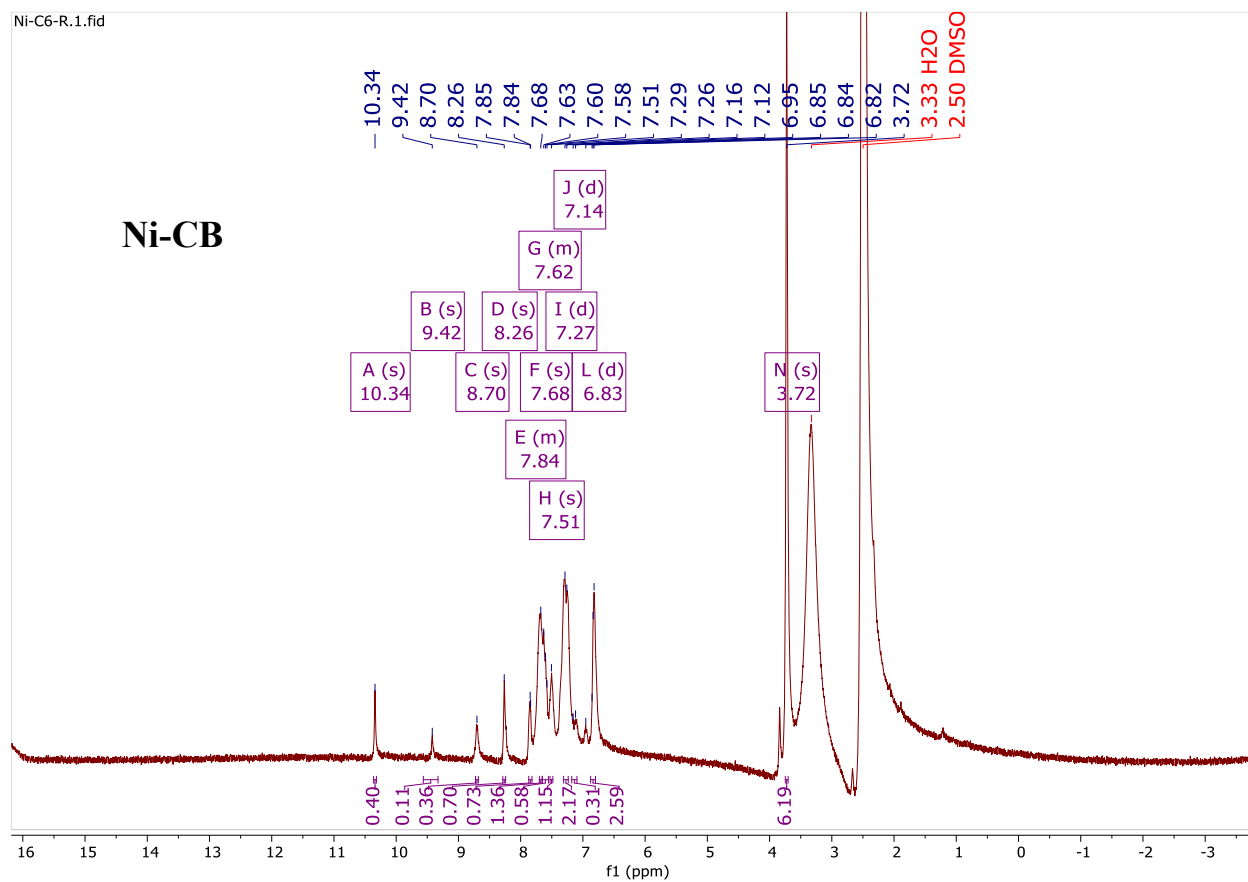

Figure S10. <sup>1</sup>H-NMR spectrum of Ni-CB complex.



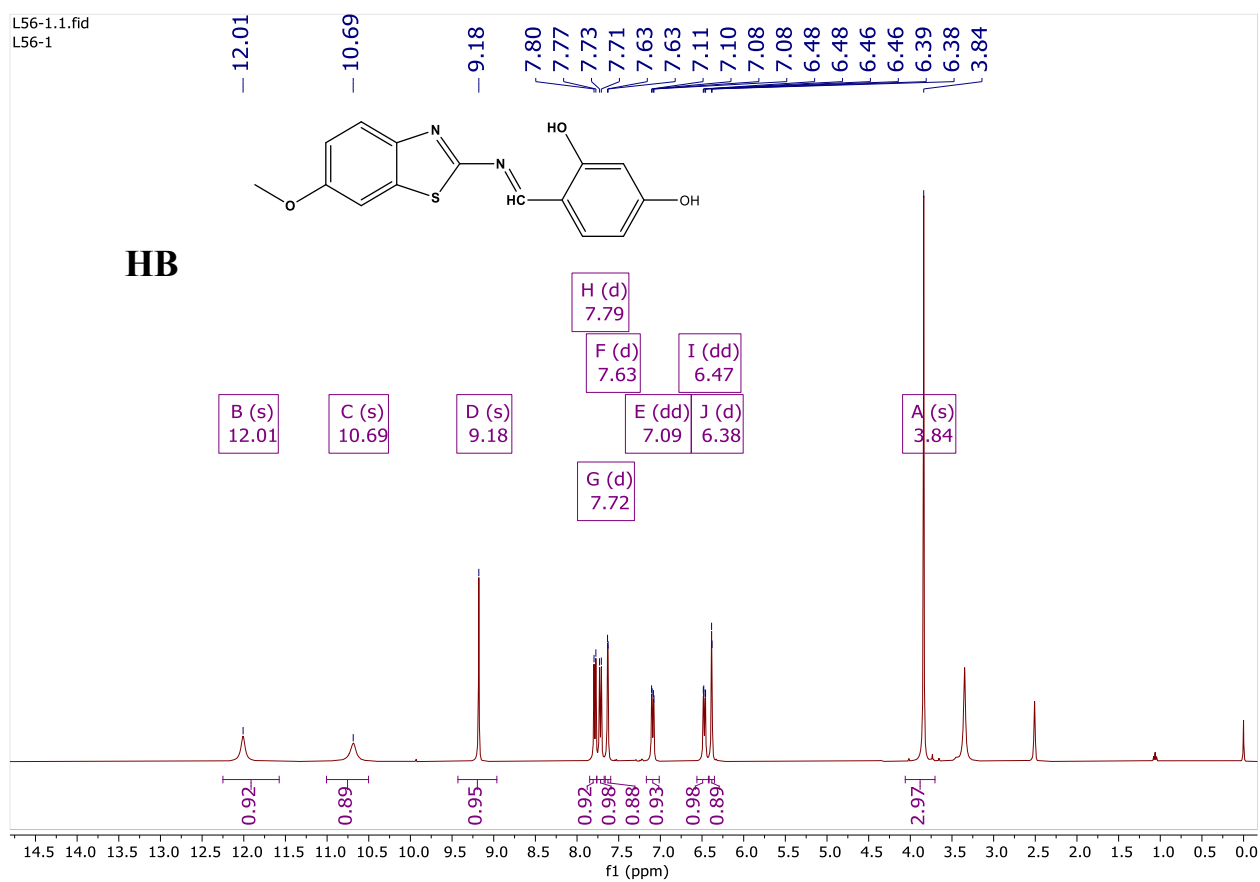

Figure S11. <sup>1</sup>H-NMR spectrum of HB ligand.



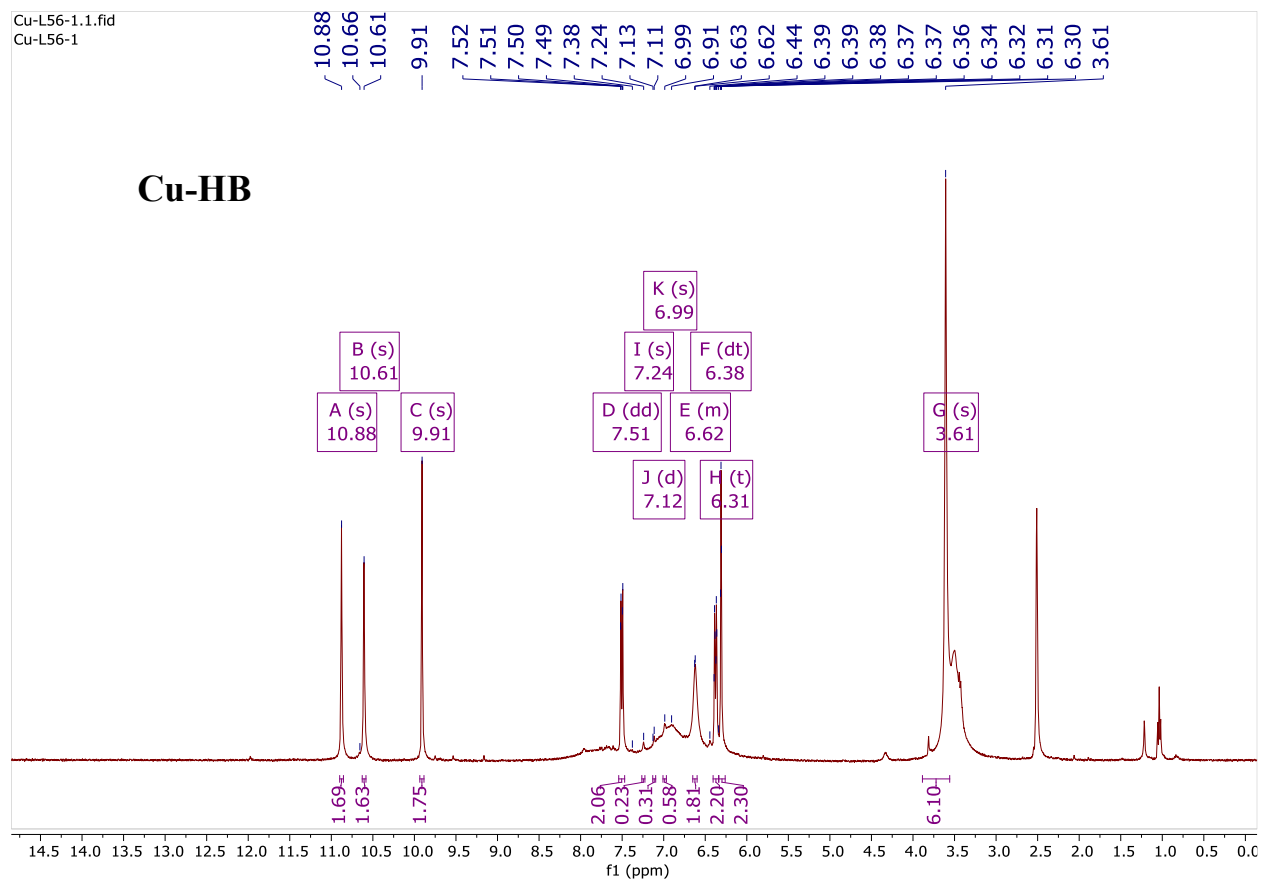

Figure S12.  $^1\text{H}$ -NMR spectrum of Cu-HB complex.



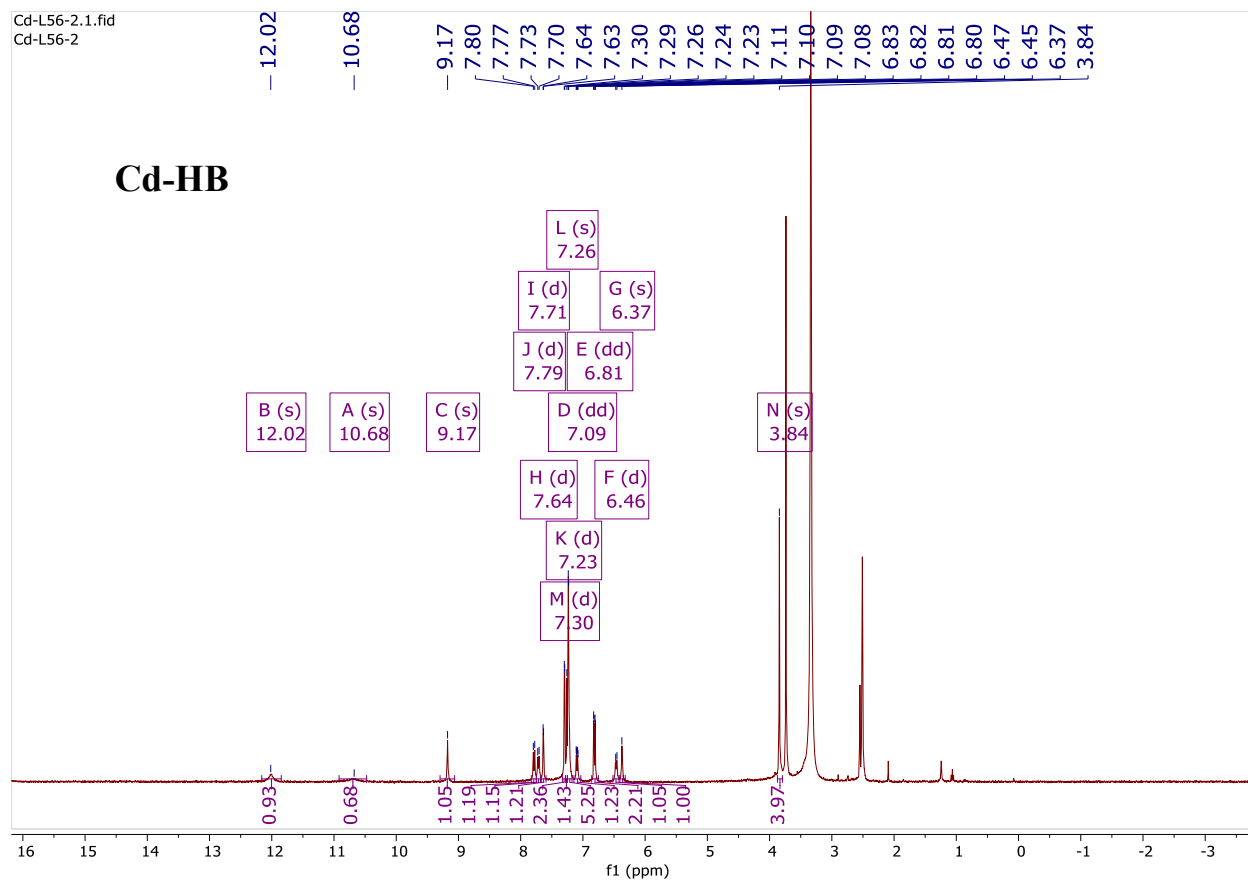

Figure S13.  $^1\text{H}$ -NMR spectrum of Cd-HB complex.



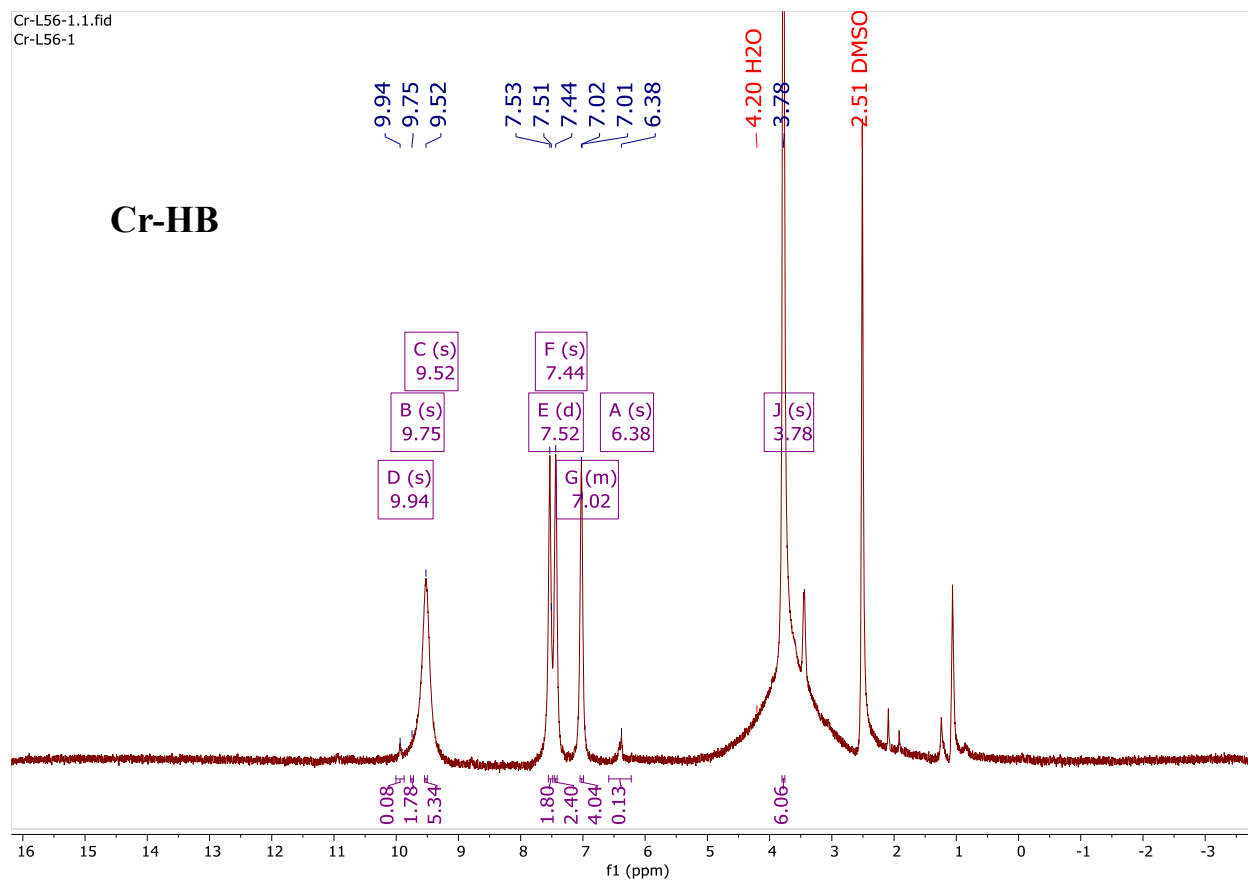

Figure S14. <sup>1</sup>H-NMR spectrum of Cr-HB complex.



## 2D-NMR



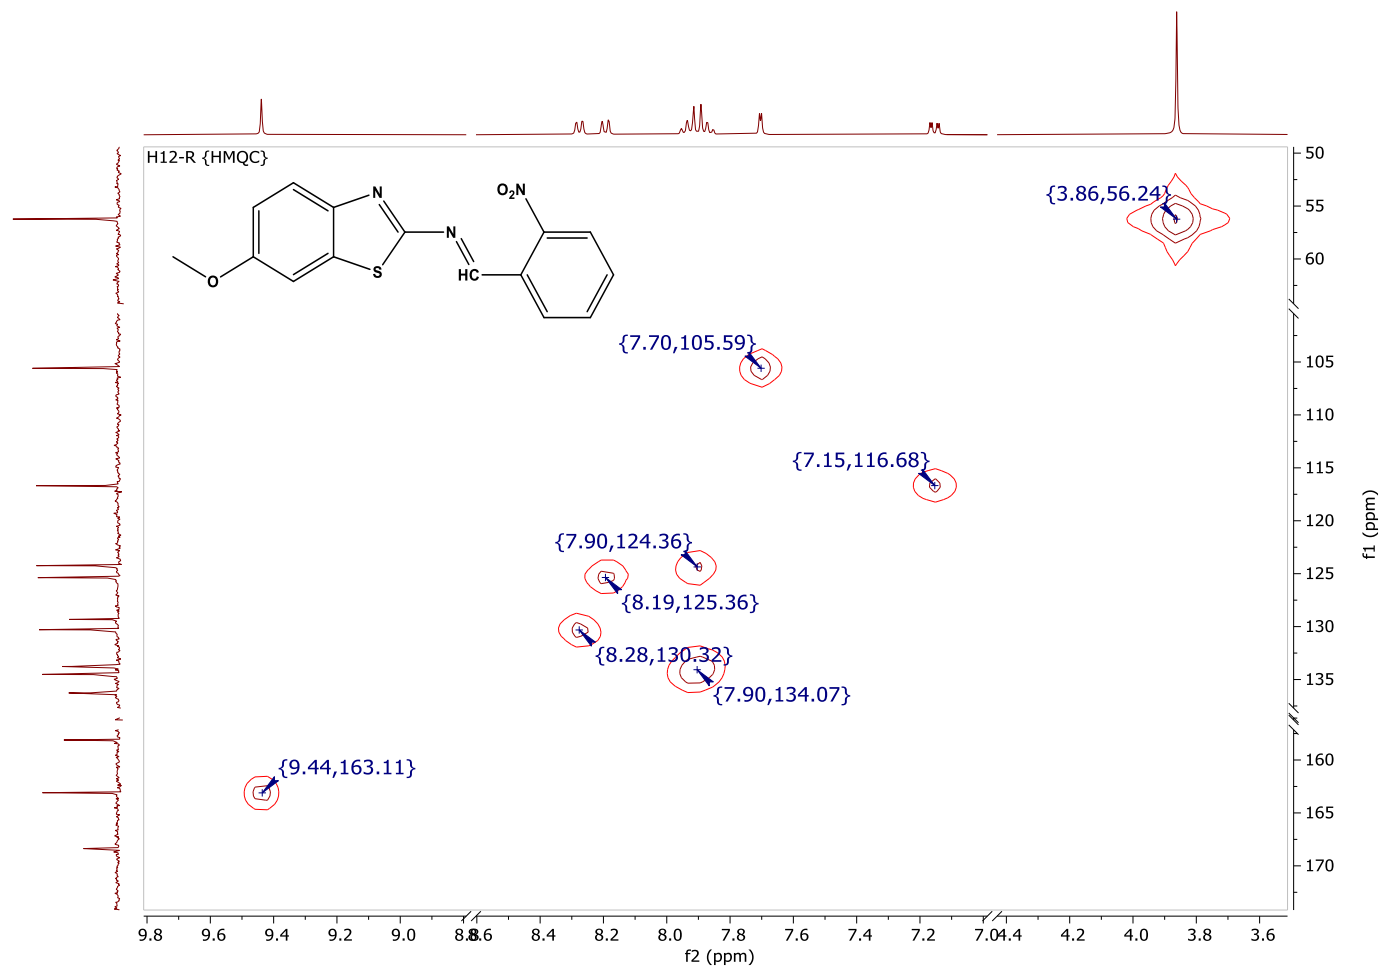

Figure S15. 2D-NMR-HMQC spectrum of NB.



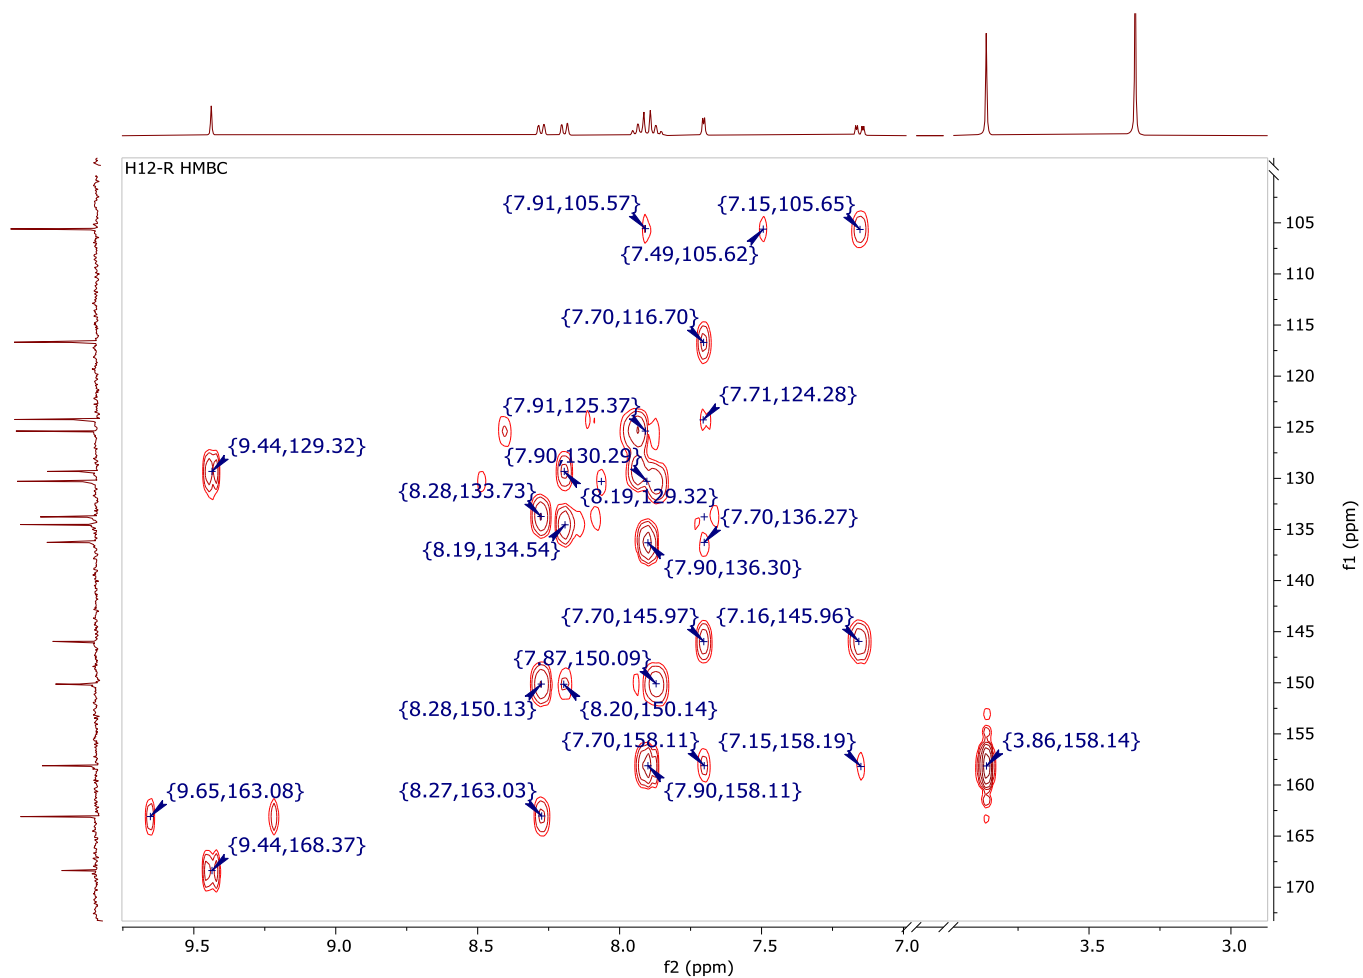

Figure S16. 2D-NMR-HMBC spectrum of NB.



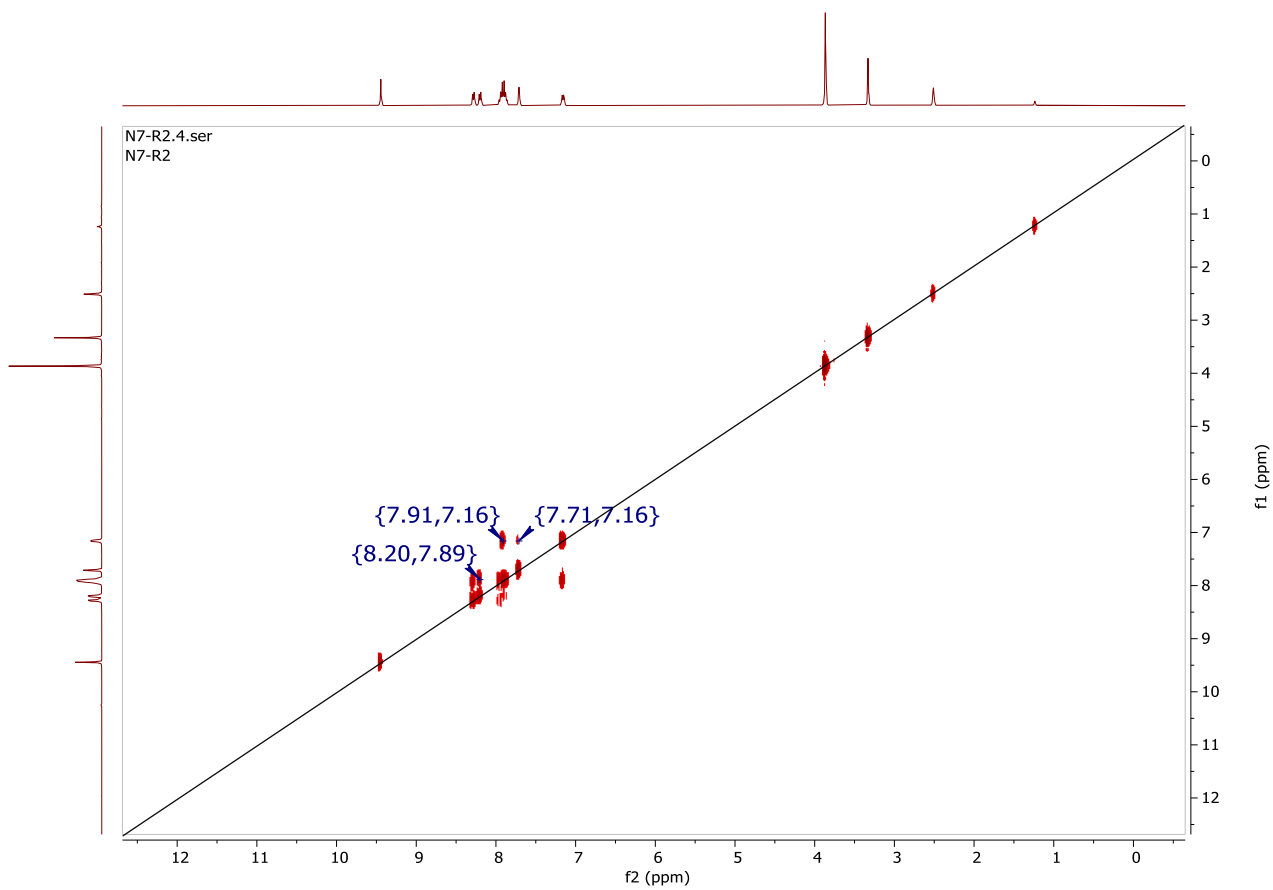

Figure S17. 2D-NMR-COSY spectrum of NB.



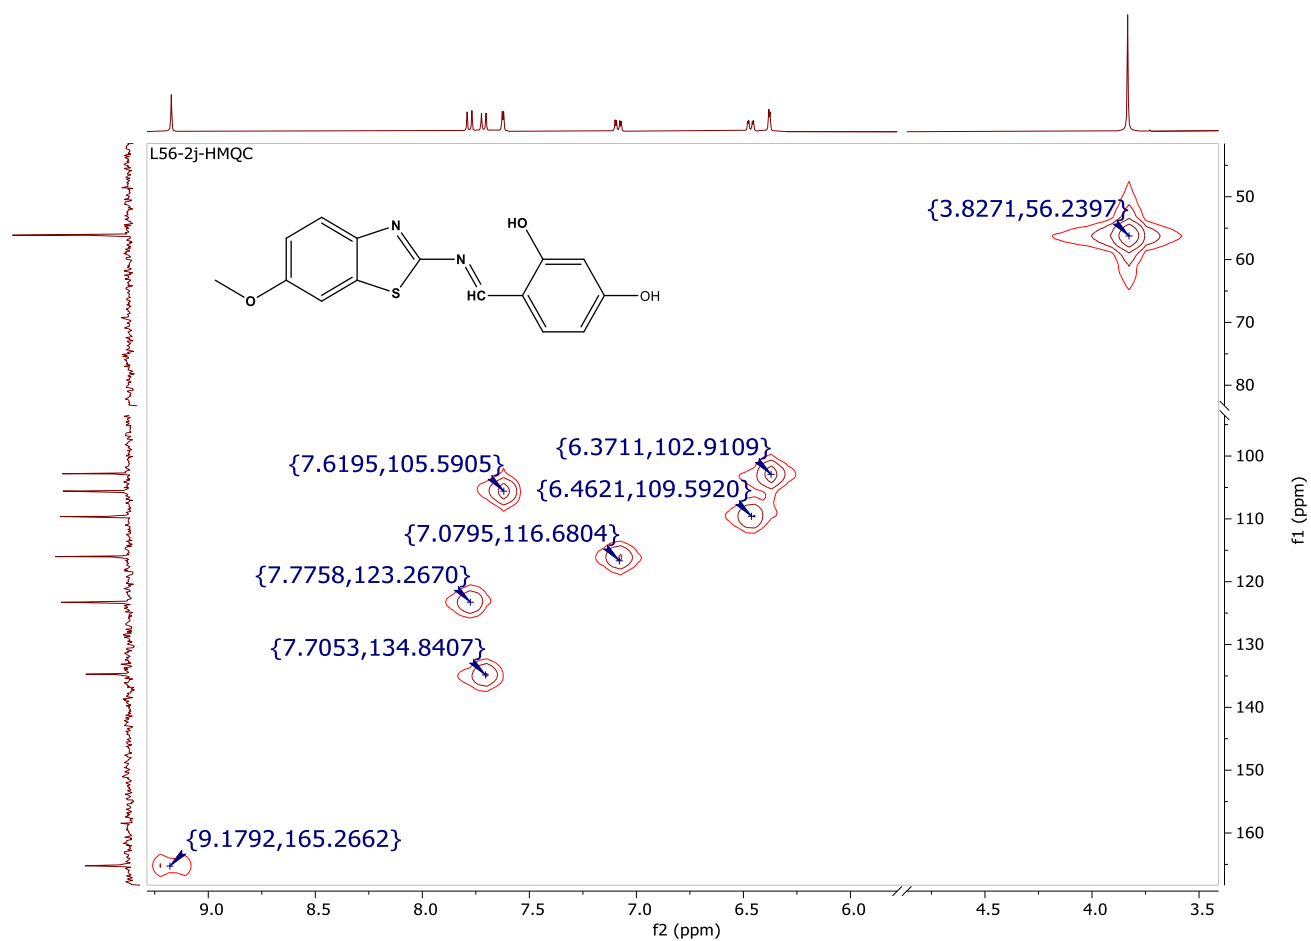

Figure S18. 2D-NMR-HMQC spectrum of HB.



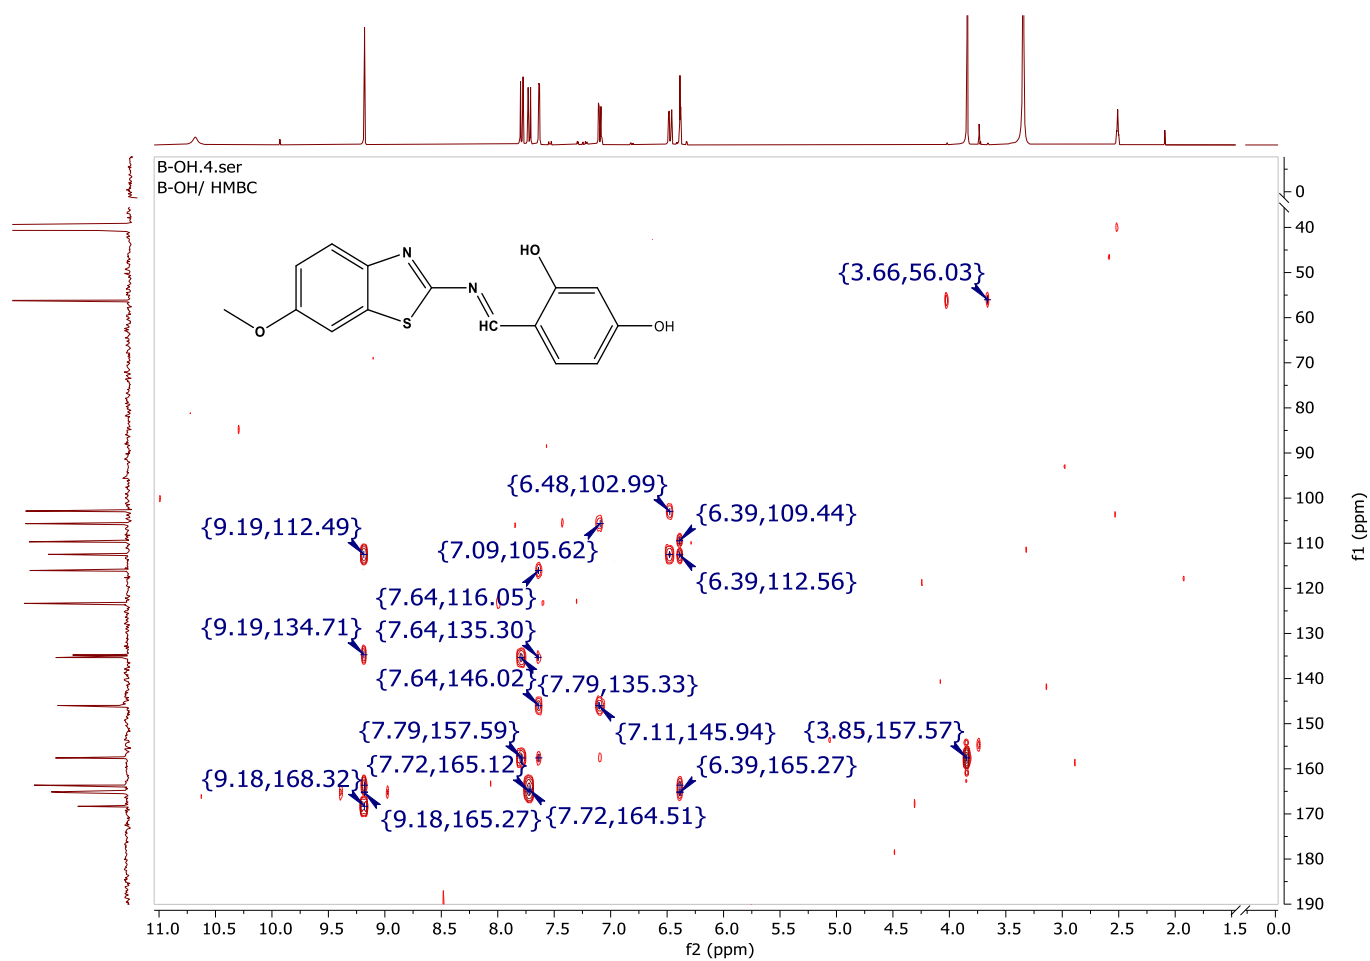

Figure S19. 2D-NMR-HMBC spectrum of HB.



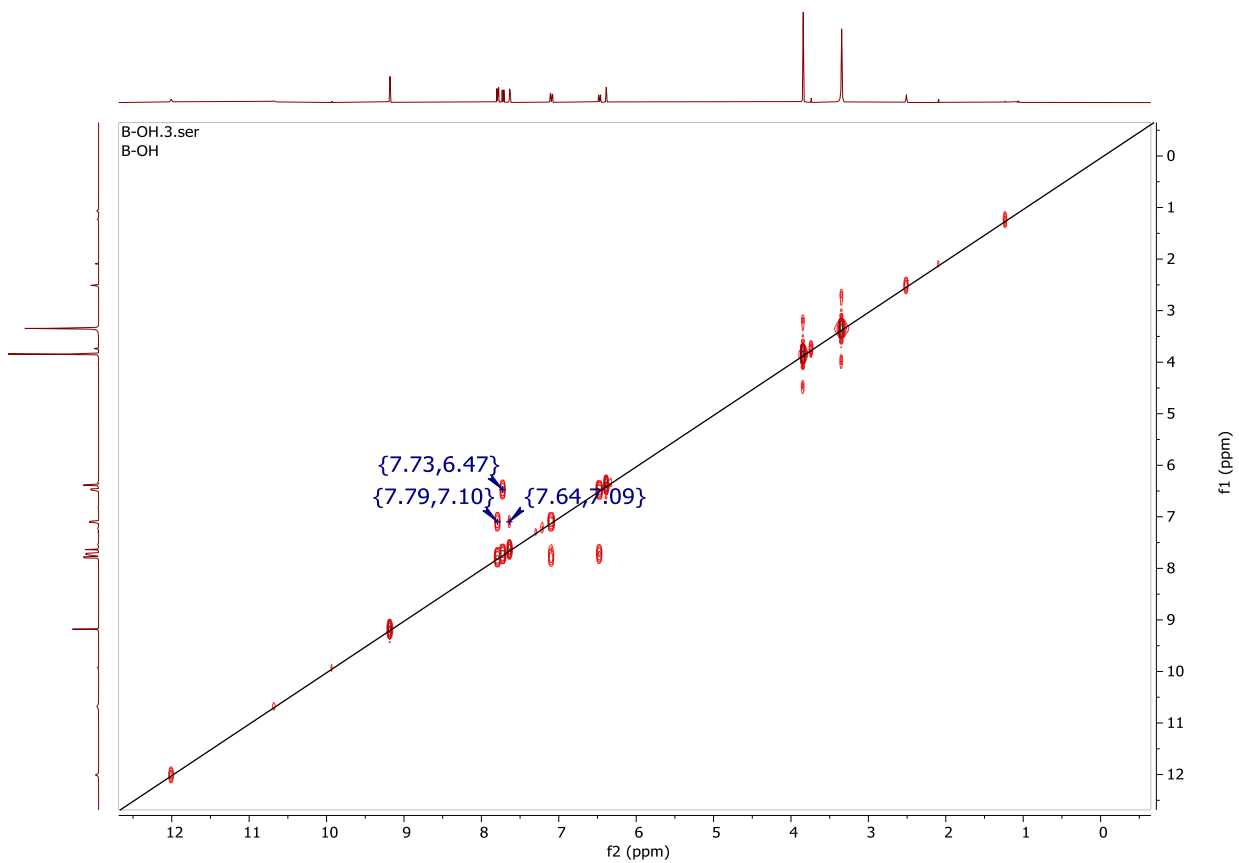

Figure S20. 2D-NMR-COSY spectrum of HB.
